# Supplementary material for: Consumer Adoption of Future MyData-Based Preventive eHealth Services: An Acceptance Model and Survey Study
Source: PubMed Central journal article supplement (PMC5756317; doi:10.2196/jmir.7821), 2017-12-22
Supplement: jmir_v19i12e429_app2.pdf [file jmir_v19i12e429_app2.pdf]

| Construct items:                                                                                                                           | Item source:                      |
|--------------------------------------------------------------------------------------------------------------------------------------------|-----------------------------------|
| <b>Performance Expectancy (PE)</b>                                                                                                         |                                   |
| PE1: The service helps one to monitor his/her health.                                                                                      | Lin 2011                          |
| PE2: The service is helpful in managing one's health data.                                                                                 | Deng 2013                         |
| PE3: The services helps to utilize one's own health data.                                                                                  | New item                          |
| PE4: The services gives feedback on how behavior affects health.                                                                           | New item                          |
| PE5: The services educate one to affect his/her own health.                                                                                | New item                          |
| <b>Effort Expectancy (EE)</b>                                                                                                              |                                   |
| EE1: Learning how to use the service is easy for me.                                                                                       | Venkatesh, Thong and Xu 2012      |
| EE2: Interaction with the service is clear and understandable.                                                                             | Venkatesh, Thong and Xu 2012      |
| EE3: I can get the services to do what I want them to do.                                                                                  | Sun, Wang, Guo and Peng 2013      |
| EE4: Instructions for using the service will be easy to follow.                                                                            | Hung and Jen 2010                 |
| <b>Social Influence (SI)</b>                                                                                                               |                                   |
| SI1: People who are important to me think that I should use the service                                                                    | Venkatesh, Thong and Xu 2012      |
| SI2: People who influence my behavior think that I should use the service.                                                                 | Venkatesh, Thong and Xu 2012      |
| SI3: People whose opinions I value prefer that I use the service.                                                                          | Venkatesh, Thong and Xu 2012      |
| SI4: Before the use situation, I have learn about the importance of these services from TV broadcast, newspaper, and other media.          | Lin 2011                          |
| <b>Facilitating Conditions (FC)</b>                                                                                                        |                                   |
| FC1: The services are compatible with other technologies I use.                                                                            | Venkatesh, Thong and Xu 2012      |
| FC2: I can get help from others when I have difficulties using the service. (changed to EE)                                                | Venkatesh, Thong and Xu 2012      |
| FC3: I would be able to use the service at any time, from anywhere.                                                                        | Deng 2013                         |
| FC4: Using the service fits into my life-style.                                                                                            | Moore and Benbasat 1991           |
| FC5: Using the service fits well with the way I like to do thing                                                                           | Moore and Benbasat 1991           |
| <b>Hedonic Motivation (HM)</b>                                                                                                             |                                   |
| HM1: Using the service is fun.                                                                                                             | Venkatesh, Thong and Xu 2012      |
| HM2: Using the service is enjoyable.                                                                                                       | Venkatesh, Thong and Xu 2012      |
| HM3: Using the service is very entertaining.                                                                                               | Venkatesh, Thong and Xu 2012      |
| <b>Habit (H)</b>                                                                                                                           |                                   |
| H1: The use of this technology/service has become a habit for me                                                                           | Venkatesh, Thong and Xu 2012      |
| H2: I am addicted to using this technology/service                                                                                         | Venkatesh, Thong and Xu 2012      |
| H3: I must use this technology/service                                                                                                     | Venkatesh, Thong and Xu 2012      |
| H4: Using this technology/service to manage my health is an obvious choice for me                                                          | Venkatesh, Thong and Xu 2012      |
| <b>Self-Efficacy (SE)</b>                                                                                                                  |                                   |
| <b>Technology use (set)</b>                                                                                                                |                                   |
| set1: I would be confident in using preventive eHealth services even if there was no one around to show me how to use them.                | Deng 2013                         |
| set2: I feel confident managing my health with the preventive eHealth services.                                                            | Deng 2013                         |
| set3: I have the skills necessary to learn and use the preventive eHealth services.                                                        | Sun, Wang, Guo and Peng 2013      |
| <b>Healthy behavior (seh)</b>                                                                                                              |                                   |
| seh1: It is easy for me to cut back on unhealthy treats.                                                                                   | Moorman and Matulich 1993         |
| seh2: It is easy for me to eat fresh fruits and vegetables regularly.                                                                      | Moorman and Matulich 1993         |
| seh3: It's easy for me to exercise three days a week.                                                                                      | Moorman and Matulich 1993         |
| <b>Threat Appraisals (TA)</b>                                                                                                              |                                   |
| <b>Vulnerability (tav)</b>                                                                                                                 |                                   |
| tav1: I find that I can fall ill easier than others.                                                                                       | Deng 2013                         |
| tav2: I find that my health is getting poor than times before.                                                                             | Lin 2011                          |
| tav3: I find that I can suffer from high blood pressure, diabetes heart disease and other chronic diseases in the future.                  | Deng 2013                         |
| <b>Severity (tas)</b>                                                                                                                      |                                   |
| tas1: If I suffered the stated problems, it would be severe.                                                                               | Sun, Wang, Guo and Peng 2013      |
| tas2: If I suffered the stated problems, it would be serious.                                                                              | Sun, Wang, Guo and Peng 2013      |
| tas3: If I suffered the stated problems, it would be significant.                                                                          | Sun, Wang, Guo and Peng 2013      |
| <b>Barriers (BA)</b>                                                                                                                       |                                   |
| <b>information risk (bai)</b>                                                                                                              |                                   |
| bai1: I am concerned that the services are not adequately secure and that they might lead to the leak or abuse of my personal information. | Deng 2013                         |
| bai2: I am concerned that the services would violate my privacy.                                                                           | Deng 2013                         |
| bai3: I am concerned that the reliability of health information provided by                                                                | Deng 2013                         |
| <b>Personal impediments (bap)</b>                                                                                                          |                                   |
| bap1: I am concerned that I might forget to use the service.                                                                               | Deng 2013                         |
| bap2: I am concerned that I might be too busy to use the service.                                                                          | Deng 2013                         |
| bap3: I have to spend effort on learning how to use the services.                                                                          | Sun, Wang, Guo and Peng 2013      |
| <b>Resistance to change (bar)</b>                                                                                                          |                                   |
| bar1: I don't want the services to change the way I currently live.                                                                        | Guo, Sun, Wang, Peng and Yan 2013 |
| bar2: I don't want the services to change the way I deal with health-relevant problems.                                                    | Guo, Sun, Wang, Peng and Yan 2013 |
| bar3: I don't want the services to change the way I keep myself healthy.                                                                   | Guo, Sun, Wang, Peng and Yan 2013 |
| bar4: I don't want the services to change the way I interact with other people.                                                            | Guo, Sun, Wang, Peng and Yan 2013 |
| <b>Technology anxiety (bata)</b>                                                                                                           |                                   |
| bata1: I hesitate to use technology for fear of making mistakes I cannot correct.                                                          | Guo, Sun, Wang, Peng and Yan 2013 |
| bata2: Mobile health services are intimidating to me. (changed to SE)                                                                      | Guo, Sun, Wang, Peng and Yan 2013 |
| <b>Technology risk (batr)</b>                                                                                                              |                                   |
| batr1: It is probable that these services would frustrate me because of their poor performance.                                            | Im, Kim and Han 2008              |
| batr2: Comparing with other technologies, these services have more uncertainties.                                                          | Im, Kim and Han 2008              |
| batr3: It is uncertain whether the service would be as effective as I think.                                                               | Im, Kim and Han 2008              |
| <b>Behavioral intention (BI)</b>                                                                                                           |                                   |
| BI1: If necessary, I would use the service.                                                                                                | Lin 2011                          |
| BI2: If available, I would use the service in the future.                                                                                  | Koivumäki, Ristola and Kesti 2008 |
| BI3: As a whole, I am highly willing to use the service                                                                                    | Lin 2011                          |
