# Supplementary material for: Consumer Adoption of Future MyData-Based Preventive eHealth Services: An Acceptance Model and Survey Study
Source: J Med Internet Res. 2017 Dec 22;19(12):e429. doi: 10.2196/jmir.7821 (PMC5756317; doi:10.2196/jmir.7821)
Supplement: Multimedia Appendix 1 [file jmir_v19i12e429_app1.pdf]

| Reference | Theory                  | Dependent variable                 | Main findings                                                                                                                                                                                                                                                                                                                     |
|-----------|-------------------------|------------------------------------|-----------------------------------------------------------------------------------------------------------------------------------------------------------------------------------------------------------------------------------------------------------------------------------------------------------------------------------|
| [11]      | TAM, HIT                | Behavioral intention               | Perceived threat, perceived usefulness, and perceived ease of use significantly affected health consumers' attitude and behavioral intention                                                                                                                                                                                      |
| [15]      | Modified UTAUT          | Perceived usefulness               | Security and privacy aspects play an important role for acceptance and usage of medical assistive technologies.                                                                                                                                                                                                                   |
| [16]      | UTAUT/UTAUT2            | Behavioral intention, Use behavior | Confirmation of the important roles of hedonic motivation, price value, and habit in influencing technology use and in UTAUT2                                                                                                                                                                                                     |
| [19]      | TAM, HBM                | User adoption                      | Perceived usefulness and benefits, perceived barriers and external cues positively affect user attitude. Perceived service availability significantly influences the perceived ease of use, perceived usefulness and benefits, which with attitude directly enhances intention.                                                   |
| [20]      | TAM                     | Health service Adoption behavior   | Resistance to change influences perceived usefulness; Technology anxiety associated negatively with perceived ease of use but positively with resistance to change; Dispositional resistance to change associated negatively with perceived ease of use but positively with resistance to change.                                 |
| [21]      | UTAUT                   | Behavioral intention               | Facilitating factors have effects on the behavioral intention through the performance and effort expectancy. Performance expectancy, effort expectancy and social influence have positive effects on behavioral intentions.                                                                                                       |
| [22]      | Social cognitive theory | Human motivation/ behavior         | Core belief affects each of the basic processes of personal change                                                                                                                                                                                                                                                                |
| [24]      | TAM, TPB, UTAUT, PMT    | Adoption intention                 | Most influential factors: response efficacy, subjective norm, self-efficacy and perceived ease of use. Subjective norm and perceived ease of use have significant impacts on adoption intention.                                                                                                                                  |
| [26]      | TAM                     | Health behavior                    | Perceived risk affects use of the information technology service negatively. Intrinsic and extrinsic motivation have a positive influence on intention to use the service and perceived risk has a negative influence.                                                                                                            |
| [27]      | Social survey           | Public attitudes and perceptions   | Consumers whose physicians use EHR were more likely to believe that EHR and HIE will improve healthcare when compared to others. Experience with a physician using an EHR had no relationship with privacy concerns.                                                                                                              |
| [33]      | UTAUT                   | Behavioral intention               | Users have a more positive perception of service benefits than non-users. Both had a high negative perception of service risk. Users also had a more positive perception of intimacy and communication associated with the services than non-users. Both users and non-users had a high behavioral intention to use the services. |
| [36]      | TAM, HBM                | Use intention                      | User's attitude is most critical determinant of their intention, followed by perceived usefulness, perceived ease-of-use, external cues to actions, and innovativeness.                                                                                                                                                           |
| [39]      | Qualitative inquiry     | Behavioral & Use intention         | The usefulness of the acquired personal health data affects intention. More emphasis should be placed on providing the data in a reusable form.                                                                                                                                                                                   |
| [41]      | UTAUT                   | Behavioral                         | Perceived risk, technology type, and gender were                                                                                                                                                                                                                                                                                  |

|      |                               |                                                           |                                                                                                                                                                                                                                                                        |
|------|-------------------------------|-----------------------------------------------------------|------------------------------------------------------------------------------------------------------------------------------------------------------------------------------------------------------------------------------------------------------------------------|
|      |                               | intention                                                 | significant moderating variables. The effects of user experience were marginal after the variance of errors were removed.                                                                                                                                              |
| [42] | Review                        | PHR adaption, Consumer behavior                           | Barriers to PHR adoption among patients include cost, privacy concerns, inconvenience, design shortcomings, and the inability to share information across organizations.                                                                                               |
| [43] | TAM                           | Adoption of personal health management services           | Perceived ease of use and perceived usefulness, significantly affected attitude. Perceived ease of use significantly affected perceived usefulness.                                                                                                                    |
| [44] | IT acceptance model           | Patient acceptance of eHealth services                    | Antecedent factors of satisfaction with provider, information-seeking preference, and Internet dependence uniquely predicted constructs in the models.                                                                                                                 |
| [45] | TAM                           | Patient acceptance of / Use intention of eHealth services | Usefulness and perceived ease of use are the main determinants of people's intention to use the service. Additional factors critical to the acceptance are the importance of the compatibility of the services with citizens' needs and trust in the service provider. |
| [46] | The e-health acceptance model | Behavioral intention                                      | A new TAM –based theoretical model, new included concepts are compatibility, credibility, perceived risk and perceived accessibility                                                                                                                                   |

---
